# Supplementary material
Source: PubMed Central journal article supplement (PMC7308051)

Supplementary Table 1 – Ordinary one-way ANOVA Tukey's and Bonferroni's multiple comparisons, two-way ANOVA Sidak's comparisons or unpaired t-test as indicated

| Ordinary one-way ANOVA                          |                                                                                          |                      |                                  |                                                                                          |                           |
|-------------------------------------------------|------------------------------------------------------------------------------------------|----------------------|----------------------------------|------------------------------------------------------------------------------------------|---------------------------|
| Tukey's multiple comparison                     |                                                                                          |                      | Bonferroni's multiple comparison |                                                                                          |                           |
|                                                 | Comparison                                                                               | (q,DF), p            |                                  | Comparison                                                                               | (t,DF), p                 |
| 3E                                              | V1+/CGRP- vs. V1+/CGRP-                                                                  | (4.732,25), 0.0071   | 4D                               | Veh vs. 2AT                                                                              | (3.834,203), 0.0005       |
|                                                 | V1+/CGRP- vs. CGRP+                                                                      | (0.2494,25), 0.9830  |                                  | Veh vs. 2AT                                                                              | (1.030e-006,203), >0.9999 |
|                                                 | V1+/CGRP- vs. CGRP+                                                                      | (5.224,25), 0.0030   |                                  | Veh vs. 2AT                                                                              | (0.5904,203), >0.9999     |
| Two-way ANOVA Sidak's Multiple Comparisons      |                                                                                          |                      |                                  |                                                                                          |                           |
| Fig                                             | Comparison                                                                               | (t,DF), p            | Fig                              | Comparison                                                                               | (t,DF), p                 |
| 5A                                              | <i>F2rl1<sup>fllox</sup>Pirt<sup>Cre</sup> - F2rl1<sup>fllox</sup>Pirt<sup>+/-</sup></i> |                      | 7A                               | <i>F2rl1<sup>fllox</sup>Pirt<sup>Cre</sup> - F2rl1<sup>fllox</sup>Pirt<sup>+/-</sup></i> |                           |
|                                                 | Day 0                                                                                    | (0.567,36), 0.9941   |                                  | Day 0                                                                                    | (0.8334,36), 0.6579       |
|                                                 | Day 1                                                                                    | (3.566,36), 0.0063   |                                  | Day 1                                                                                    | (2.713,36), 0.0595        |
|                                                 | Day 3                                                                                    | (3.451,36), 0.0086   |                                  | Day 3                                                                                    | (1.924,36), 0.3200        |
|                                                 | Day 5                                                                                    | (3.128,36), 0.0207   |                                  | Day 5                                                                                    | (1.350,36), 0.7081        |
|                                                 | Day 24                                                                                   | (2.924,36), 0.0351   |                                  | Day 24                                                                                   | (2.780,36), 0.0505        |
| 5B                                              | Day 48                                                                                   | (1.968,36), 0.2959   | 7B                               | Day 48                                                                                   | (1.860,36), 0.3573        |
|                                                 | Day 0                                                                                    | (0.0128,36), >0.9999 |                                  | Day 0                                                                                    | (0.6346,36), 0.9892       |
|                                                 | Day 1                                                                                    | (2.858,36), 0.0415   |                                  | Day 1                                                                                    | (0.9149,36), 0.9353       |
|                                                 | Day 3                                                                                    | (5.035,36), <0.0001  |                                  | Day 3                                                                                    | (1.433,36), 0.6503        |
|                                                 | Day 5                                                                                    | (4.061,36), 0.0015   |                                  | Day 5                                                                                    | (0.3080,36), 0.9998       |
|                                                 | Day 24                                                                                   | (3.394,36), 0.0101   |                                  | Day 24                                                                                   | (0.4505,36), 0.9983       |
| 5C                                              | Day 48                                                                                   | (0.1576,36), >0.9999 | 7C                               | Day 48                                                                                   | (0.6950,72), >0.9999      |
|                                                 | Day 0                                                                                    | (0.4197,72), 0.9988  |                                  | Day 0                                                                                    | (0.7067,72), 0.9807       |
|                                                 | Day 1                                                                                    | (4.567,72), 0.0001   |                                  | Day 1                                                                                    | (1.779,72), 0.3914        |
|                                                 | Day 3                                                                                    | (3.246,72), 0.0106   |                                  | Day 3                                                                                    | (0.4273,72), 0.9987       |
|                                                 | Day 5                                                                                    | (5.836,72), <0.0001  |                                  | Day 5                                                                                    | (0.2667,72), >0.9999      |
|                                                 | Day 24                                                                                   | (2.230,72), 0.1612   |                                  | Day 24                                                                                   | (0.09526,72), >0.9999     |
| 6A                                              | Day 48                                                                                   | (0.4778,72), 0.9976  | 8A                               | Day 48                                                                                   | (0.6950,72), 0.9823       |
|                                                 | Day 0                                                                                    | (0.000,36), >0.9999  |                                  | Day 0                                                                                    | (0.2688,36), >0.9999      |
|                                                 | Day 1                                                                                    | (3.550,36), 0.0066   |                                  | Day 1                                                                                    | (0.8489,36), 0.9541       |
|                                                 | Day 3                                                                                    | (5.071,36), <0.0001  |                                  | Day 3                                                                                    | (1.542,36), 0.5717        |
|                                                 | Day 5                                                                                    | (5.071,36), <0.0001  |                                  | Day 5                                                                                    | (1.316,36), 0.7310        |
|                                                 | Day 24                                                                                   | (1.521,36), 0.5867   |                                  | Day 24                                                                                   | (0.2830,36), 0.9999       |
| 6B                                              | Day 48                                                                                   | (1.014,36), 0.8987   | 8B                               | Day 48                                                                                   | (0.5235,36), 0.9961       |
|                                                 | Day 0                                                                                    | (0.000,36), >0.9999  |                                  | Day 0                                                                                    | (0.4783,36), 0.9974       |
|                                                 | Day 1                                                                                    | (4.914,36), 0.0001   |                                  | Day 1                                                                                    | (2.935,36), 0.0342        |
|                                                 | Day 3                                                                                    | (6.047,36), <0.0001  |                                  | Day 3                                                                                    | (3.560,36), 0.0064        |
|                                                 | Day 5                                                                                    | (3.024,36), 0.0272   |                                  | Day 5                                                                                    | (3.168,36), 0.0186        |
|                                                 | Day 24                                                                                   | (1.512,36), 0.5935   |                                  | Day 24                                                                                   | (1.388,36), 0.6818        |
| 6C                                              | Day 48                                                                                   | (0.3780,36), 0.9994  | 8C                               | Day 48                                                                                   | (0.1483,36), >0.9999      |
|                                                 | Day 0                                                                                    | (0.2657,72), >0.9999 |                                  | Day 0                                                                                    | (0.06628,72), >0.9999     |
|                                                 | Day 1                                                                                    | (5.048,72), <0.0001  |                                  | Day 1                                                                                    | (0.3125,72), 0.9998       |
|                                                 | Day 3                                                                                    | (9.830,72), <0.0001  |                                  | Day 3                                                                                    | (2.992,72), 0.0225        |
|                                                 | Day 5                                                                                    | (3.720,72), 0.0024   |                                  | Day 5                                                                                    | (2.178,72), 0.1808        |
|                                                 | Day 24                                                                                   | (1.860,72), 0.3404   |                                  | Day 24                                                                                   | (0.06628,72), >0.9999     |
| Day 48                                          | (0.2657,72), >0.9999                                                                     | Day 48               | (0.3125,72), 0.9998              |                                                                                          |                           |
| Two-way ANOVA Bonferroni's multiple comparisons |                                                                                          |                      |                                  |                                                                                          |                           |
| Fig                                             | Comparison                                                                               | (t,DF), p            | Fig                              | Comparison                                                                               | (t,DF), p                 |
| 9A                                              | IL-31 (19 pmol)                                                                          | (4.092,21), 0.0026   | 9B                               | IL-31 (19 pmol)                                                                          | (4.083,20), 0.0029        |
|                                                 | 2AT (30 pmol)                                                                            | (0.9546,21), >0.9999 |                                  | 2AT (30 pmol)                                                                            | (4.168,20), 0.0024        |
|                                                 | 2AT (100 pmol)                                                                           | (0.7710,21), >0.9999 |                                  | 2AT (100 pmol)                                                                           | (4.644,20), 0.0008        |
|                                                 | 2AT (10 nmol)                                                                            | (7.330,21), <0.0001  |                                  | 2AT (10 nmol)                                                                            | (1.750,20), 0.3944        |
|                                                 | 2AT (10 nmol) <i>F2rl1<sup>-/-</sup></i>                                                 | (2.644,21), 0.0760   |                                  | 2AT (10 nmol) <i>F2rl1<sup>-/-</sup></i>                                                 | (7.566,20), <0.0001       |
| Unpaired t-test                                 |                                                                                          |                      |                                  |                                                                                          |                           |
| Fig                                             | (t,DF), p                                                                                | Fig                  | (t,DF), p                        |                                                                                          |                           |
| 5A                                              | (4.081,6), 0.0065                                                                        | 7A                   | (3.004,6), 0.0239                |                                                                                          |                           |
| 5B                                              | (8.638,6), 0.0001                                                                        | 7B                   | (0.1899,6), 0.8556               |                                                                                          |                           |
| 5C                                              | (5.919,12), <0.0001                                                                      | 7C                   | (0.3496,12), 0.7327              |                                                                                          |                           |
| 6A                                              | (9.798,6), <0.0001                                                                       | 8A                   | (0.2170,6), 0.8354               |                                                                                          |                           |
| 6B                                              | (4.494,6), 0.0041                                                                        | 8B                   | (2.541,6), 0.0440                |                                                                                          |                           |
| 6C                                              | (6.545,12), <0.0001                                                                      | 8C                   | (4.023,12), 0.0017               |                                                                                          |                           |

Supplementary Table 2 - Two-way ANOVA Dunnett's comparisons

| Fig       | Comparison       | (q,DF), p                                      |  | Comparison       | (q,DF), p                                      |  |
|-----------|------------------|------------------------------------------------|--|------------------|------------------------------------------------|--|
|           |                  | <i>F2rl1<sup>fllox</sup>Piir<sup>Cre</sup></i> |  |                  | <i>F2rl1<sup>fllox</sup>Piir<sup>+/+</sup></i> |  |
| <b>5A</b> | Day 0 vs. Day 1  | (2.732,30), 0.0422                             |  | Day 0 vs. Day 1  | (5.802,30), <0.0001                            |  |
|           | Day 0 vs. Day 3  | (1.750,30), 0.2975                             |  | Day 0 vs. Day 3  | (4.702,30), 0.0003                             |  |
|           | Day 0 vs. Day 5  | (2.017,30), 0.1863                             |  | Day 0 vs. Day 5  | (4.639,30), 0.0003                             |  |
|           | Day 0 vs. Day 24 | (1.974,30), 0.2018                             |  | Day 0 vs. Day 24 | (4.387,30), 0.0006                             |  |
|           | Day 0 vs. Day 48 | (0.02667,30), >0.9999                          |  | Day 0 vs. Day 48 | (1.408,30), 0.4959                             |  |
| <b>5B</b> | Day 0 vs. Day 1  | (1.865,30), 0.2247                             |  | Day 0 vs. Day 1  | (4.650,30), 0.0003                             |  |
|           | Day 0 vs. Day 3  | (2.543,30), 0.0644                             |  | Day 0 vs. Day 3  | (7.440,30), <0.0001                            |  |
|           | Day 0 vs. Day 5  | (2.023,30), 0.1843                             |  | Day 0 vs. Day 5  | (5.976,30), <0.0001                            |  |
|           | Day 0 vs. Day 24 | (0.07999,30), 0.9999                           |  | Day 0 vs. Day 24 | (3.225,30), 0.0130                             |  |
|           | Day 0 vs. Day 48 | (0.3381,30), 0.9966                            |  | Day 0 vs. Day 48 | (0.5035,30), 0.9815                            |  |
| <b>5C</b> | Day 0 vs. Day 1  | (5.233,60), <0.0001                            |  | Day 0 vs. Day 1  | (9.373,60), <0.0001                            |  |
|           | Day 0 vs. Day 3  | (3.790,30), 0.0017                             |  | Day 0 vs. Day 3  | (6.605,60), <0.0001                            |  |
|           | Day 0 vs. Day 5  | (1.083,60), 0.7181                             |  | Day 0 vs. Day 5  | (6.477,60), <0.0001                            |  |
|           | Day 0 vs. Day 24 | (1.186,60), 0.6454                             |  | Day 0 vs. Day 24 | (2.989,60), 0.0176                             |  |
|           | Day 0 vs. Day 48 | (0.9787,60), 0.7879                            |  | Day 0 vs. Day 48 | (0.08473,60), 0.9999                           |  |
| <b>6A</b> | Day 0 vs. Day 1  | (0.000,30), >0.9999                            |  | Day 0 vs. Day 1  | (3.337,30), 0.0098                             |  |
|           | Day 0 vs. Day 3  | (0.476,30), 0.9854                             |  | Day 0 vs. Day 3  | (5.244,30), <0.0001                            |  |
|           | Day 0 vs. Day 5  | (0.476,30), 0.9854                             |  | Day 0 vs. Day 5  | (5.244,30), <0.0001                            |  |
|           | Day 0 vs. Day 24 | (1.059e-015,30), >0.9999                       |  | Day 0 vs. Day 24 | (1.430,30), 0.4812                             |  |
|           | Day 0 vs. Day 48 | (0.000,30), >0.9999                            |  | Day 0 vs. Day 48 | (0.9535,30), 0.8035                            |  |
| <b>6B</b> | Day 0 vs. Day 1  | (1.348,30), 0.5361                             |  | Day 0 vs. Day 1  | (7.187,30), <0.0001                            |  |
|           | Day 0 vs. Day 3  | (0.8984,30), 0.8362                            |  | Day 0 vs. Day 3  | (8.086,30), <0.0001                            |  |
|           | Day 0 vs. Day 5  | (0.8984,30), 0.8362                            |  | Day 0 vs. Day 5  | (4.492,30), 0.0005                             |  |
|           | Day 0 vs. Day 24 | (4.987e-016,30), >0.9999                       |  | Day 0 vs. Day 24 | (1.797,30), 0.2751                             |  |
|           | Day 0 vs. Day 48 | (9.975e-016,30), >0.9999                       |  | Day 0 vs. Day 48 | (0.4492,3), 0.9888                             |  |
| <b>6C</b> | Day 0 vs. Day 1  | (0.8478,60), 0.8653                            |  | Day 0 vs. Day 1  | (6.500,60), <0.0001                            |  |
|           | Day 0 vs. Day 3  | (0.5652,60), 0.9709                            |  | Day 0 vs. Day 3  | (11.30,60), <0.0001                            |  |
|           | Day 0 vs. Day 5  | (0.5652,60), 0.9709                            |  | Day 0 vs. Day 5  | (4.804,60), <0.0001                            |  |
|           | Day 0 vs. Day 24 | (1.098e-015,60)>0.9999                         |  | Day 0 vs. Day 24 | (2.261,60), 0.1051                             |  |
|           | Day 0 vs. Day 48 | (0.2826,60), 0.9984                            |  | Day 0 vs. Day 48 | (0.2826,60), 0.9984                            |  |
| <b>7A</b> | Day 0 vs. Day 1  | (0.5954,30), 0.9630                            |  | Day 0 vs. Day 1  | (2.471,30), 0.0752                             |  |
|           | Day 0 vs. Day 3  | (1.415,30), 0.4911                             |  | Day 0 vs. Day 3  | (2.503,30), 0.0701                             |  |
|           | Day 0 vs. Day 5  | (0.06533,30), >0.9999                          |  | Day 0 vs. Day 5  | (0.5806,30), 0.9665                            |  |
|           | Day 0 vs. Day 24 | (1.512,30), 0.4296                             |  | Day 0 vs. Day 24 | (3.454,30), 0.0073                             |  |
|           | Day 0 vs. Day 48 | (0.1470,30), 0.9998                            |  | Day 0 vs. Day 48 | (1.172,30), 0.6582                             |  |
| <b>7B</b> | Day 0 vs. Day 1  | (2.212,30), 0.1281                             |  | Day 0 vs. Day 1  | (2.515,30), 0.0684                             |  |
|           | Day 0 vs. Day 3  | (1.758,30), 0.2936                             |  | Day 0 vs. Day 3  | (2.618,30), 0.0545                             |  |
|           | Day 0 vs. Day 5  | (2.981,30), 0.0236                             |  | Day 0 vs. Day 5  | (1.964,30), 0.2054                             |  |
|           | Day 0 vs. Day 24 | (2.537,30), 0.0652                             |  | Day 0 vs. Day 24 | (2.339,30), 0.0992                             |  |
|           | Day 0 vs. Day 48 | (2.997,30), 0.0227                             |  | Day 0 vs. Day 48 | (2.442,30), 0.0799                             |  |
| <b>7C</b> | Day 0 vs. Day 1  | (3.373,60), 0.0059                             |  | Day 0 vs. Day 1  | (4.518,60), 0.0001                             |  |
|           | Day 0 vs. Day 3  | (4.138,60), 0.0006                             |  | Day 0 vs. Day 3  | (2.928,60), 0.0207                             |  |
|           | Day 0 vs. Day 5  | (3.691,60), 0.0023                             |  | Day 0 vs. Day 5  | (3.221,60), 0.0092                             |  |
|           | Day 0 vs. Day 24 | (3.757,60), 0.0018                             |  | Day 0 vs. Day 24 | (3.104,60), 0.0128                             |  |
|           | Day 0 vs. Day 48 | (3.877,60), 0.0013                             |  | Day 0 vs. Day 48 | (3.864,60), 0.0013                             |  |
| <b>8A</b> | Day 0 vs. Day 1  | (0.3268,30), 0.9970                            |  | Day 0 vs. Day 1  | (0.2558,30), 0.9987                            |  |
|           | Day 0 vs. Day 3  | (1.080,30), 0.7213                             |  | Day 0 vs. Day 3  | (0.1989,30), 0.9997                            |  |
|           | Day 0 vs. Day 5  | (0.04263,30), >0.9999                          |  | Day 0 vs. Day 5  | (1.549,30), 0.4070                             |  |
|           | Day 0 vs. Day 24 | (0.3268,30), 0.9970                            |  | Day 0 vs. Day 24 | (0.3126,30), 0.9977                            |  |
|           | Day 0 vs. Day 48 | (0.2984,30), 0.9982                            |  | Day 0 vs. Day 48 | (0.04263,30), >0.9999                          |  |
| <b>8B</b> | Day 0 vs. Day 1  | (0.5990,30), 0.9620                            |  | Day 0 vs. Day 1  | (2.409,30), 0.0857                             |  |
|           | Day 0 vs. Day 3  | (0.3777,30), 0.9949                            |  | Day 0 vs. Day 3  | (3.399,30), 0.0084                             |  |
|           | Day 0 vs. Day 5  | (0.8595,30), 0.8578                            |  | Day 0 vs. Day 5  | (2.4350,30), 0.0811                            |  |
|           | Day 0 vs. Day 24 | (2.513,30), 0.0686                             |  | Day 0 vs. Day 24 | (3.620,30), 0.0048                             |  |
|           | Day 0 vs. Day 48 | (0.3386,30), 0.9966                            |  | Day 0 vs. Day 48 | (0.4428,30), 0.9895                            |  |
| <b>8C</b> | Day 0 vs. Day 1  | (2.463,60), 0.0666                             |  | Day 0 vs. Day 1  | (2.821,60), 0.0274                             |  |
|           | Day 0 vs. Day 3  | (1.495,60), 0.4315                             |  | Day 0 vs. Day 3  | (4.338,60), 0.0002                             |  |
|           | Day 0 vs. Day 5  | (1.352,60), 0.5273                             |  | Day 0 vs. Day 5  | (3.474,60), 0.0044                             |  |
|           | Day 0 vs. Day 24 | (0.9581,60), 0.8010                            |  | Day 0 vs. Day 24 | (1.084,60), 0.7177                             |  |
|           | Day 0 vs. Day 48 | (0.2776,60), 0.9985                            |  | Day 0 vs. Day 48 | (0.08059,60), 0.9999                           |  |

**Quote** TKC-150921-ARR-01

**Gene** mF2r1

**Method** After confirming correctly targeted ES clones via Southern Blotting, we selected some clones for blastocyst microinjection, followed by chimera production. Founders were confirmed as germline-transmitted via crossbreeding with Flp-deleter. In the end, 4 male and 4 female F1 heterozygous mutant mice were confirmed as the final deliverables for this project.

**Diagram** Breeding Outcome

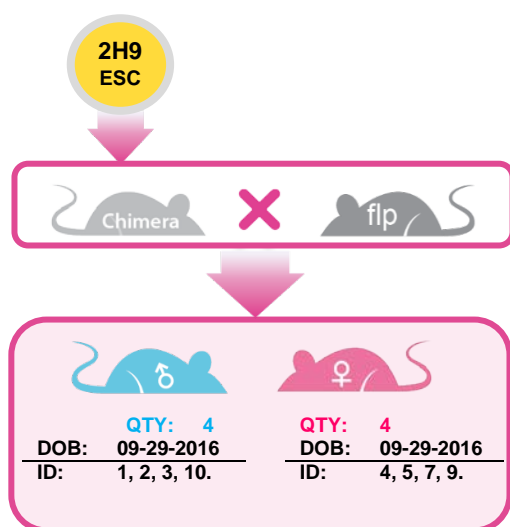

Genotyping Strategy

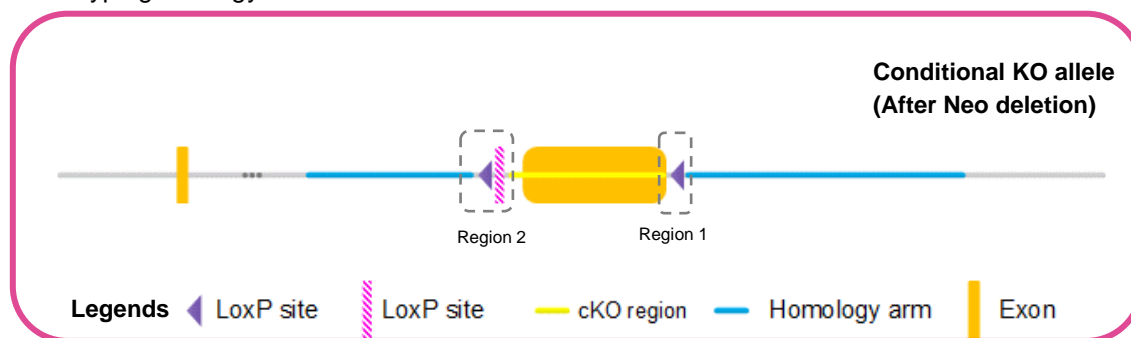

**Primers for Region1 (Annealing Temperature 60.0 °C):**

Forward: AGAACGGTCAGCTGAAAAGGTGTGT  
Reverse: TGAATGCCTCCAGTGGTCAGAGAG

**Primers for Region2 (Annealing Temperature 60.0 °C):**

Forward: CTAGGTTGAATCTTGGCTTAAGGC  
Reverse: CACCAGCAGTCTTTGATTGGTCAG

**Result** 8 pups from clone 2H9 were identified positive by PCR screening for region1 and the positive pups were reconfirmed by PCR screening for region2.

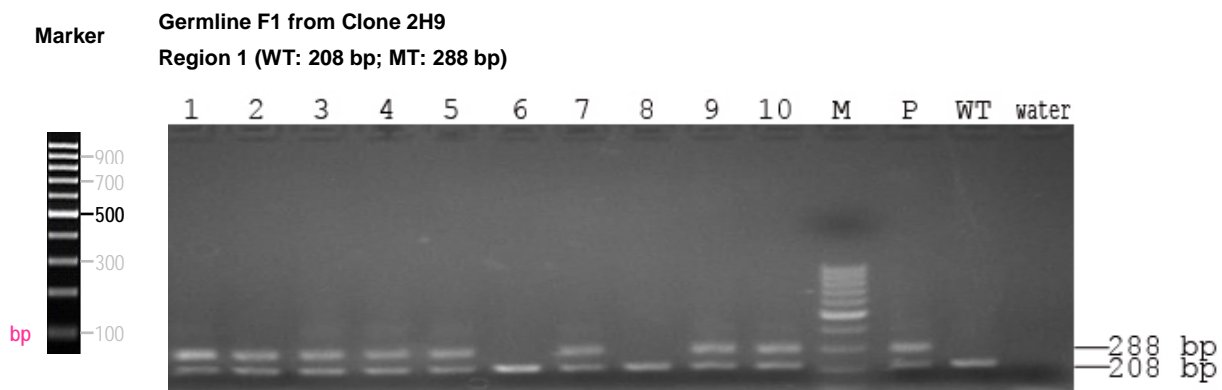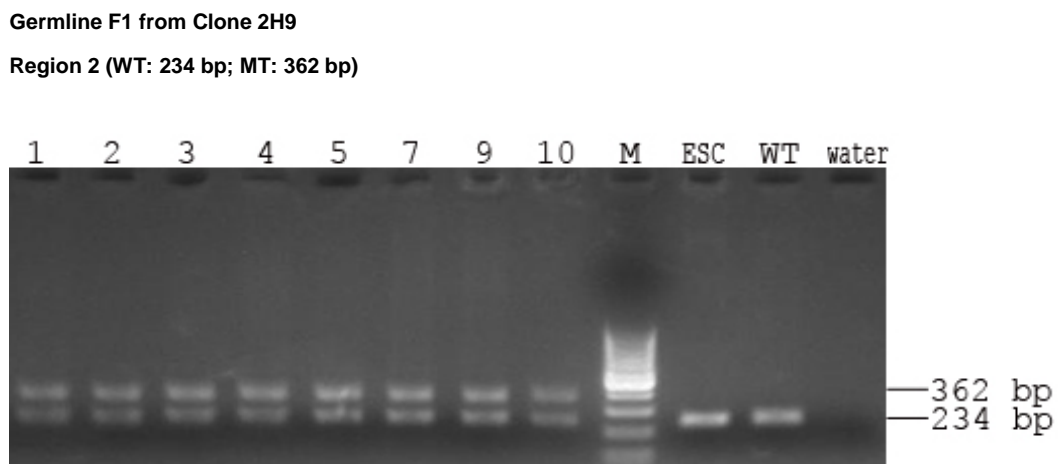

**Quote** TKC-150921-ARR-01

**Gene** mF2r1

**Method** The linearized vector was subsequently delivered to ES cells (C57BL/6) via electroporation, followed by drug selection, PCR screening, and Southern Blot confirmation.

After gaining 184 drug-resistant clones, we have confirmed 10 potentially targeted clones, 6 of which were expanded for Southern Blotting.

**Diagram 1** Regions in the following diagram were selected for PCR screening

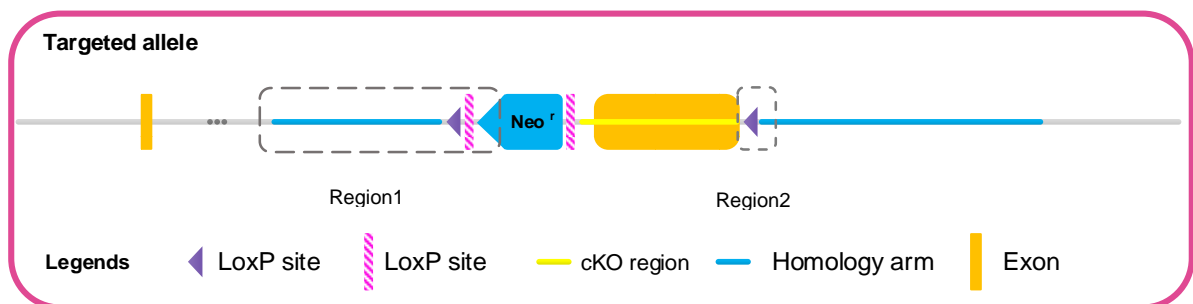

**Primers for Region 1 (Annealing Temperature 60.0 °C):**

Forward: CTCACACTCAAGTTAGCCATGTTG

Reverse: GCTGACCGCTTCCTCGTGCTTTA

**Primers for Region 2 (Annealing Temperature 60.0 °C):**

Forward: AGAACGGTCAGCTGAAAAGGTGTGT

Reverse: TGAATGCCTCCAGTGGTCAGAGAG

**Result** Samples 1B2, 1H5, 1F7, 1B10, 1H12, 2C2, 2H1, 2E8, 2B10 and 2H9 have been confirmed as potentially targeted ES clones.

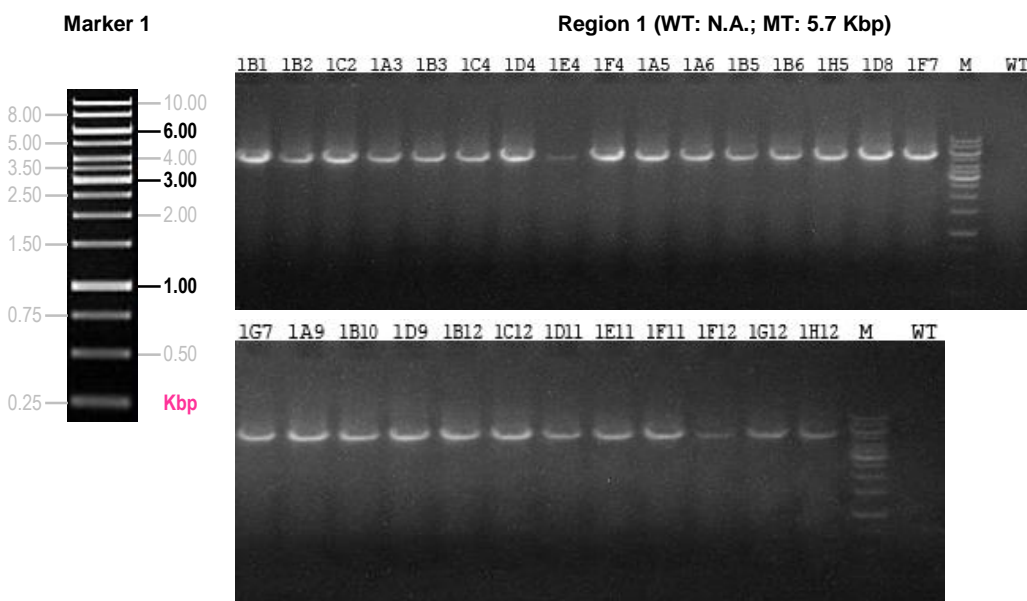

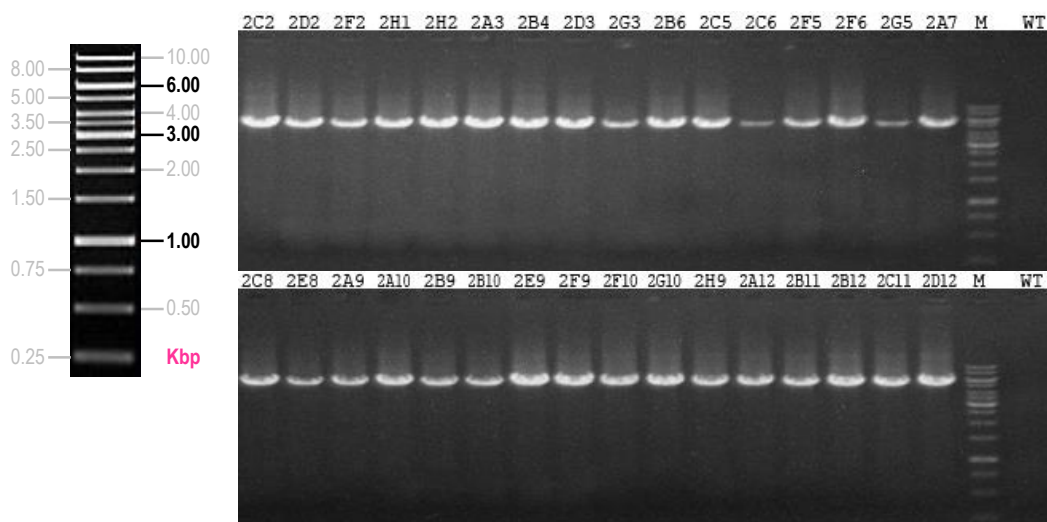

Marker 2

Region 2 (WT: 208 bp; MT: 288 bp)

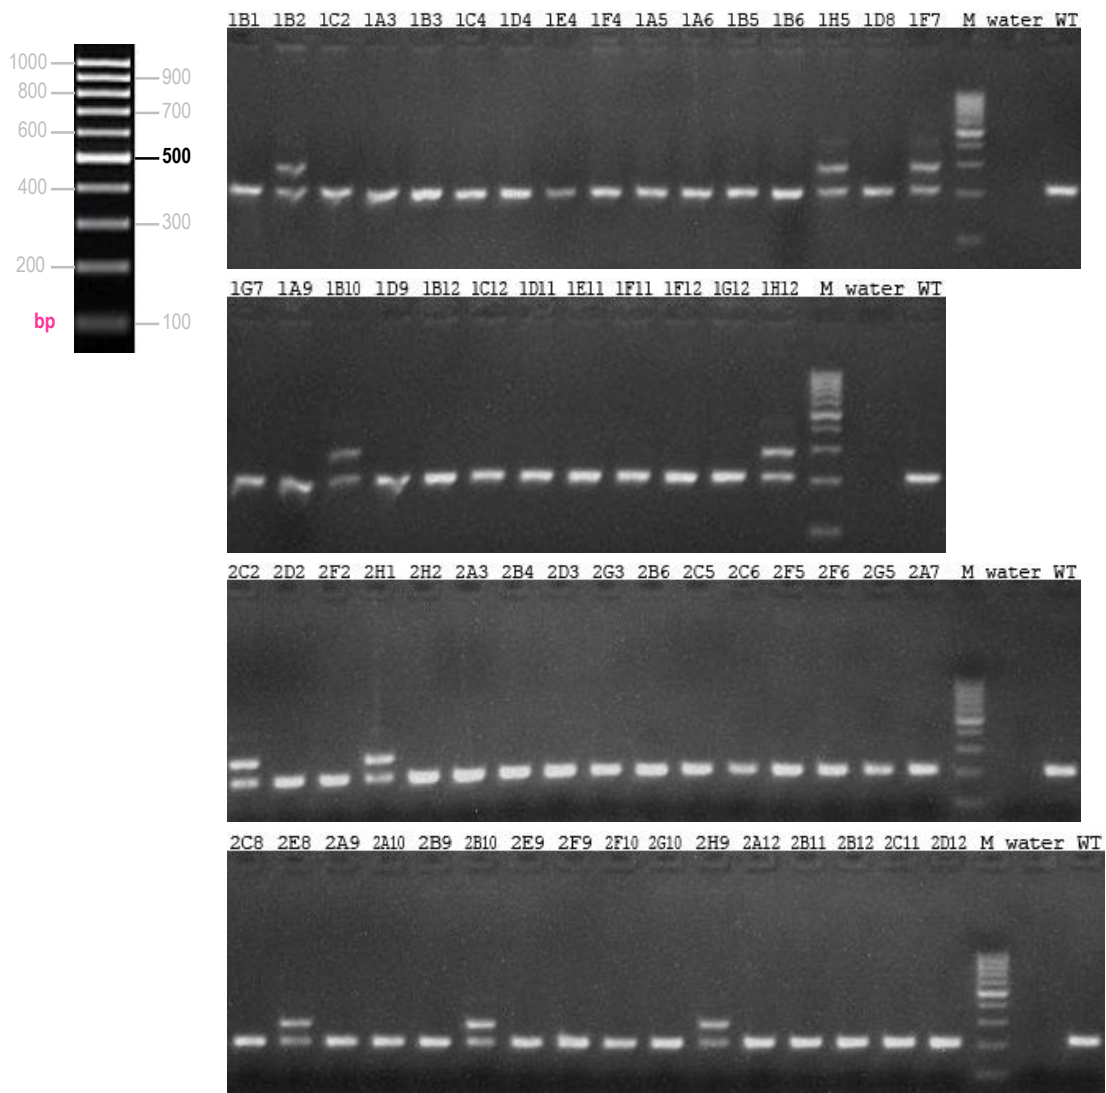

**Diagram 2** Regions in the following diagram were selected for Southern Blotting

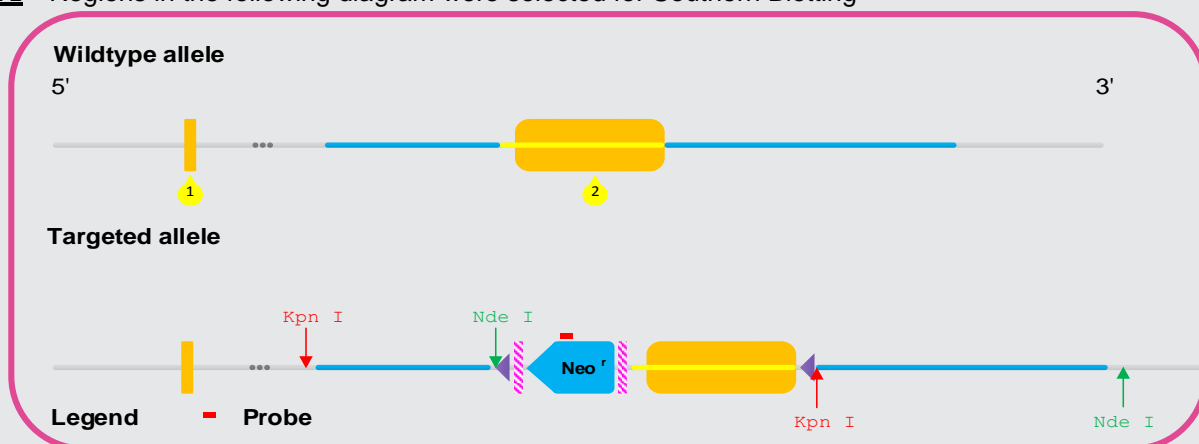

**Expected Fragment Sizes for Southern Blotting:**

Neo Probe (containing 5' HA) – 14.0 Kbp – Kpn I

Neo Probe (containing 3' HA) – 14.4 Kbp – Nde I

**Result** All of the six ES clones (2E8, 1F7, 2H1, 1H12, 1H5 and 2H9) were confirmed correct by southern blot analysis.

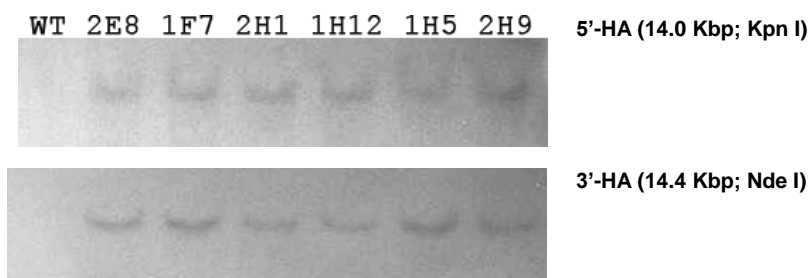

Supplement: jciinsight-5-137393-s099.pdf [file jciinsight-5-137393-s099.pdf]
